# Supplementary material for: Delta-like 4 mRNA is regulated by adjacent natural antisense transcripts
Source: PubMed Central journal article supplement (PMC4409748; doi:10.1186/s13221-015-0028-9), 2015-03-24
Supplement: 13221_2015_28_MOESM1_ESM.pdf [file 13221_2015_28_MOESM1_ESM.pdf]

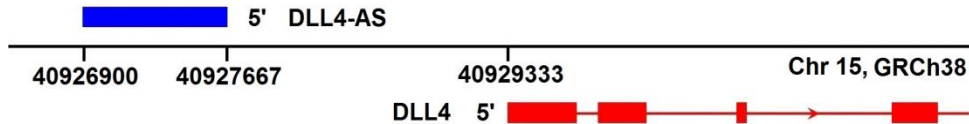

**Supplementary figure 1** Schematic representation of *DLL4* locus in Homo sapiens chromosome 15, GRCh38 Primary Assembly. *DLL4* mRNA starting from 40929333 is shown in red boxes; *DLL4-AS* starting from 40927667 and ending at 40926900 is shown in a blue box.

### ***DLL4-AS* sequence**

```

GGCCCAGGCTGCGCTCGGGAGTTAATGTAGGTTATGGGCAGGCGGAGTCCCAGGCCCGA
GGGAGGGGGGAGTCCGGGGCGTGCCTCCCGGCGATCCTGGCAAGTGGGCTCCCAGATCTT
CTCTCCGCCTATACCCTATGGATCCCTGGACTTGCCTCTCTAAGATGCCAGCGGGTGCCC
CTTGCTCCCCTCCAAGCTGGCATCCAGCCCTACCTAGCCCTGTCCTCTCTCAACTCCAAAT
CCTGGCCCAGGAGTTAATAAAAACATCCTCCTTTTCTGGCGCTGGTCCTGCTTACCTGACC
CTCAAGGGAGACATCTAGTCCCACACAAGGCATCTCTCCAATACTGGAAAATCTGGAACA
CTCTCTACCCTCATACACGCCAGACTAATGTGCCCAAATGTACTTTGCAAATTATCAAGGA
CCAAACAAAAGTTGGGATTATTATCTTCAGAGAGGCAGCACCCAGGAGATCCCAGAGATCT
AGAAAGGCTCTGACCAGAAGAGGAAAGGGTTAAATTCTCAGCATCAAAGACATTCATGAA
ACACCTATTTGCGGAGGCGCTGTCCCAGAAGCTCATTCCCGGGCTAGGACACTGCCACCC
TTGGCCCTGGGTACCTACGAGCGCTCCCACACGCTGCGGTCGAGCTTTGCCACATTTGC
TGAGCAGGAGAGGGTCATGCTGCGGGTGGGGAGCCCAGTGCGAAGGCCGCAAGTGTTTC
TGTCAGCCCAAACACTGGGGCTGCGCCTTCCTTCTTCTCCCACTC

```
